# Supplementary material for: A time-direction field linking gravitational redshift, decoherence and horizon thermality
Source: Research Square preprint supplement (doi:10.21203/rs.3.rs-7585314/v1), 2025-09-16
Supplement: Supplementary file 1 [file 8cfd66f3095dae3cdede6d57.pdf]

# Supplementary Information for *A time-direction field linking GR redshift, decoherence, and horizon thermality*

Behnam Dehghani  
Intelitive Research Lab, Amadora, Lisbon, Portugal  
Email: bd@intelitive.com Tel: +351-932-297-030

## Contents

|                                                                               |          |
|-------------------------------------------------------------------------------|----------|
| <b>Conventions</b>                                                            | <b>2</b> |
| <b>1 Axioms, definitions, and immediate consequences (Note S1)</b>            | <b>2</b> |
| <b>2 Redshift renormalization: derivation and weak-field bounds (Note S2)</b> | <b>3</b> |
| 2.1 General static spacetimes . . . . .                                       | 3        |
| 2.2 Schwarzschild specialization . . . . .                                    | 3        |
| 2.3 Weak-field expansion and null tests . . . . .                             | 3        |
| 2.4 Comments on $\kappa$ and regularity . . . . .                             | 3        |
| <b>3 Open quantum dynamics: GKSL structure from the axioms (Note S3)</b>      | <b>4</b> |
| 3.1 From pulsed projection to GKSL . . . . .                                  | 4        |
| 3.2 TLS example and the intrinsic floor . . . . .                             | 4        |
| 3.3 Bounding $T_i$ in practice . . . . .                                      | 4        |
| 3.4 Thermodynamic consistency . . . . .                                       | 4        |
| <b>4 Horizon thermality and analogue tests (Note S4)</b>                      | <b>4</b> |
| 4.1 Euclidean regularity . . . . .                                            | 4        |
| 4.2 Analogue platforms and ratio tests . . . . .                              | 5        |
| <b>5 Cosmological background and perturbations (Note S5)</b>                  | <b>5</b> |
| 5.1 Effective action and equations . . . . .                                  | 5        |
| 5.2 FRW background . . . . .                                                  | 5        |
| 5.3 Linear perturbations and forces . . . . .                                 | 5        |
| <b>6 Time-direction tomography and correlated noise (Note S6)</b>             | <b>5</b> |
| 6.1 Linear response of observables . . . . .                                  | 5        |
| 6.2 Network model and cross spectra . . . . .                                 | 6        |
| <b>7 Parameterizations, priors, and identifiability (Note S7)</b>             | <b>6</b> |
| <b>8 Statistical procedures and uncertainty (Note S8)</b>                     | <b>6</b> |
| 8.1 Clock redshift bounds . . . . .                                           | 6        |
| 8.2 Decoherence floor . . . . .                                               | 6        |
| 8.3 Network tomography . . . . .                                              | 6        |
| <b>9 Consistency checks and absence of pathologies (Note S9)</b>              | <b>7</b> |

|                                                                       |           |
|-----------------------------------------------------------------------|-----------|
| <b>10 Extended notes and worked examples (Note S10)</b>               | <b>7</b>  |
| 10.1 Worked weak-field null test . . . . .                            | 7         |
| 10.2 TLS spectroscopy protocol . . . . .                              | 7         |
| 10.3 Analogue horizon ratio test . . . . .                            | 7         |
| <b>11 Distinctiveness and relation to other frameworks (Note S11)</b> | <b>7</b>  |
| <b>Figures</b>                                                        | <b>9</b>  |
| <b>Inventory of Supplementary Materials</b>                           | <b>11</b> |
| <b>Data and code availability</b>                                     | <b>11</b> |

## Conventions

We set  $c = \hbar = k_B = 1$  unless explicitly stated. Metric signature  $(-, +, +, +)$ . “Observed” frequencies/temperatures are with respect to the laboratory (or asymptotic) time coordinate. All vectors in the internal time plane are dimensionless. Boldface denotes spatial tensors when needed.

## 1 Axioms, definitions, and immediate consequences (Note S1)

**Axiom 1** (Unit-time vector (constancy)). *There exists a two-component time vector  $\vec{T} = (T_r, T_i) \in \mathbb{R}_{\geq 0}^2$  with invariant norm*

$$\|\vec{T}\| = 1 \iff T_r^2 + T_i^2 = 1. \quad (1)$$

**Axiom 2** (Pulsed realization). *Time unfolds as a sequence of discrete pulses  $\{\vec{T}^{(n)}\}_{n \in \mathbb{Z}}$  with  $\|\vec{T}^{(n)}\| = 1$ . Between pulses, the vector vanishes; at each pulse it reappears with a (possibly) different direction.*

**Axiom 3** (No pure axis (irreducible blend)). *Let  $\vartheta^{(n)}$  be the polar angle of  $\vec{T}^{(n)}$ , so  $T_r^{(n)} = \cos \vartheta^{(n)}$ ,  $T_i^{(n)} = \sin \vartheta^{(n)}$ . For all pulses*

$$0 < \vartheta^{(n)} < \frac{\pi}{2}. \quad (2)$$

*Thus neither component ever vanishes; there is no purely unitary nor purely dissipative pulse.*

**Definition 1** (Coupling to observables). *Experimental (instrumental) observables couple predominantly to  $T_r$ ; phenomenological/entropic observables couple to  $T_i$ . The perceived flow of time tracks the sequence  $\{T_i^{(n)}\}$ ; clock readings track  $\{T_r^{(n)}\}$ .*

**Remark 1** (State dependence). *The direction  $\vartheta(x)$  may depend on contextual parameters (curvature, acceleration, entropy rate, environment), while the norm (1) is invariant.*

**Parametrization.** Write

$$\vec{T} = (\cos \vartheta, \sin \vartheta), \quad 0 < \vartheta < \frac{\pi}{2}. \quad (3)$$

Define the lapse renormalization

$$A(\vartheta) = \sqrt{\cos^2 \vartheta + \kappa \sin^2 \vartheta}, \quad \kappa \geq 0, \quad (4)$$

and its log-derivative

$$g_{\vartheta}(\vartheta) := \partial_{\vartheta} \ln A(\vartheta) = \frac{(\kappa - 1) \sin \vartheta \cos \vartheta}{\cos^2 \vartheta + \kappa \sin^2 \vartheta}. \quad (5)$$

Useful identities:

$$\partial_{\vartheta} \ln T_r = -\tan \vartheta, \quad \partial_{\vartheta} \ln T_i = \cot \vartheta. \quad (6)$$

**Consequences.** Axiom 3 implies  $T_r, T_i \in (0, 1)$ , hence (i) no exactly unitary pulse; (ii) no exactly frozen dissipation. This yields the *intrinsic decoherence floor* once open-system dynamics are written in GKSL form (Sec. 3).

## 2 Redshift renormalization: derivation and weak-field bounds (Note S2)

### 2.1 General static spacetimes

For a static metric with Killing time  $t$ , the GR redshift between emission ( $e$ ) and observation ( $o$ ) is

$$(1 + z)_{\text{GR}} = \sqrt{\frac{-g_{tt}(x_o)}{-g_{tt}(x_e)}}, \quad (7)$$

a standard textbook result [1]. In our framework the physical lapse is rescaled by  $A(\vartheta)$ :

$$g_{tt} \rightarrow A(\vartheta)^2 g_{tt}. \quad (8)$$

Therefore

$$1 + z = \frac{\nu_e}{\nu_o} = \frac{A[\vartheta(x_o)]}{A[\vartheta(x_e)]} \sqrt{\frac{-g_{tt}(x_o)}{-g_{tt}(x_e)}}. \quad (9)$$

### 2.2 Schwarzschild specialization

For  $ds^2 = -(1 - r_s/r) dt^2 + (1 - r_s/r)^{-1} dr^2 + r^2 d\Omega^2$ ,

$$1 + z = \frac{A[\vartheta(r_o)]}{A[\vartheta(r_e)]} \sqrt{\frac{1 - \frac{r_s}{r_o}}{1 - \frac{r_s}{r_e}}}. \quad (10)$$

### 2.3 Weak-field expansion and null tests

With  $-g_{tt} \simeq 1 + 2\Phi$  (Newtonian potential,  $|\Phi| \ll 1$ ),

$$\Delta \ln \frac{\nu_o}{\nu_e} = \underbrace{\Delta \ln A}_{\text{new}} + \underbrace{\Delta \Phi}_{\text{GR}} + \mathcal{O}(\Phi^2). \quad (11)$$

Given a fractional sensitivity  $\sigma_y$  over baseline  $L$ ,

$$|\Delta \vartheta| \lesssim \frac{\sigma_y}{|g_{\vartheta}(\vartheta)|}, \quad |\nabla \vartheta| \lesssim \frac{\sigma_y/L}{|g_{\vartheta}(\vartheta)|}. \quad (12)$$

Vertical comparisons use geodesy or local gravimetry to subtract  $\Delta \Phi$ , while fiber-linked or co-located clocks exploit common-mode rejection to isolate  $\Delta \ln A$  [2–8].

### 2.4 Comments on $\kappa$ and regularity

If  $\kappa = 0$ ,  $A(\vartheta) = \cos \vartheta$  can be arbitrarily small as  $\vartheta \rightarrow \pi/2$  (but never zero by Axiom 3). Choosing  $\kappa > 0$  keeps  $A(\vartheta) \geq \sqrt{\kappa} \sin \vartheta$ , avoiding near-vanishing lapse factors.

**Illustration (Prediction 1).** See Fig. 2: synthetic regression and GR-subtracted residuals visualize the  $\Delta \ln A$  channel and the bounds of Eq. (12).

### 3 Open quantum dynamics: GKSL structure from the axioms (Note S3)

#### 3.1 From pulsed projection to GKSL

Axiomatically, each pulse contributes a reversible increment along  $\tau_r$  and an irreversible increment along  $\tau_i$ . For a coarse-grained time step  $\Delta t$  that spans many pulses, linearity and complete positivity of reduced dynamics (Born–Markov–secular assumptions when appropriate) give a GKSL generator [9–11]:

$$\dot{\rho}_t = -i T_r [H, \rho_t] + T_i \mathcal{D}_\beta(\rho_t), \quad T_r^2 + T_i^2 = 1, \quad (13)$$

with quantum detailed balance

$$\mathcal{D}_\beta(\rho) = \sum_\omega \gamma_\omega \left( L_\omega \rho L_\omega^\dagger - \frac{1}{2} \{ L_\omega^\dagger L_\omega, \rho \} \right), \quad \gamma_{-\omega} = e^{-\beta\omega} \gamma_{+\omega}. \quad (14)$$

Axiom 3 enforces  $T_i > 0$ , hence irreversibility is *never* exactly switched off.

#### 3.2 TLS example and the intrinsic floor

For a two-level system (TLS) with splitting  $\Omega$ ,

$$\Gamma_2^{\text{obs}} = T_i \Gamma_2^{\text{vac}} + \Gamma_2^{\text{env}}, \quad \Rightarrow \quad \Gamma_2^{\text{min}} \geq T_i \Gamma_2^{\text{vac}}. \quad (15)$$

#### 3.3 Bounding $T_i$ in practice

Measure  $\Gamma_2$  as a function of a control parameter that scales bath occupation/spectral density (e.g., temperature, engineered reservoir strength, readout power), fit  $\Gamma_2^{\text{env}}$ , and extrapolate to  $\Gamma_2^{\text{env}} \rightarrow 0$ . With an independently calibrated  $\Gamma_2^{\text{vac}}$ , obtain

$$T_i \leq \frac{\Gamma_2^{\text{min}}}{\Gamma_2^{\text{vac}}} \quad (95\% \text{ C.L.}). \quad (16)$$

**Illustration (Prediction 2).** See Fig. 3: regressions and bootstrap summaries quantify the intercept  $T_i \Gamma_2^{\text{vac}}$  and the bound in Eq. (16).

#### 3.4 Thermodynamic consistency

Spohn’s inequality implies monotonic decay of relative entropy and non-equilibrium free energy with a rate proportional to  $T_i$  [11, 12]:

$$\frac{d}{dt} D(\rho_t \| \rho_\beta) = -T_i \sigma(\rho_t) \leq 0, \quad \frac{d}{dt} F(\rho_t) = -\frac{T_i}{\beta} \sigma(\rho_t) \leq 0. \quad (17)$$

### 4 Horizon thermality and analogue tests (Note S4)

#### 4.1 Euclidean regularity

Near a static Killing horizon with surface gravity  $\kappa_{\text{sg}}$ , Euclidean time must be periodic with period  $\beta_{\text{proper}} = 2\pi/\kappa_{\text{sg}}$  [13, 14]. The proper-time increment relates to the laboratory time as  $d\tau_{\text{proper}} = A(\vartheta) dt_r$ , so

$$T_\infty = \frac{A(\vartheta_\infty)}{A(\vartheta_{\text{hor}})} \frac{\kappa_{\text{sg}}}{2\pi}. \quad (18)$$

GR is recovered when  $\vartheta$  is constant.

## 4.2 Analogue platforms and ratio tests

Water tanks, fiber optics, and BEC horizons probe Hawking kinematics and correlations [15–21]. To test (18), compare otherwise identical runs  $a, b$  with controlled changes that co-vary with  $\vartheta$ :

$$\frac{T_{\infty}^{(a)}}{T_{\infty}^{(b)}} = \frac{A(\vartheta_{\infty}^{(a)})/A(\vartheta_{\text{hor}}^{(a)})}{A(\vartheta_{\infty}^{(b)})/A(\vartheta_{\text{hor}}^{(b)})}. \quad (19)$$

# 5 Cosmological background and perturbations (Note S5)

## 5.1 Effective action and equations

Adopt a time-only disformal coupling for matter:

$$g_{\mu\nu}^{\text{eff}} = g_{\mu\nu} + (A(\vartheta)^2 - 1)u_{\mu}u_{\nu}, \quad (20)$$

with  $u_{\mu}$  a unit timelike one-form (e.g., ADM normal). The total action reads

$$S = \frac{M_{\text{Pl}}^2}{2} \int d^4x \sqrt{-g} R + \int d^4x \sqrt{-g} \left[ \frac{M_{\vartheta}^2}{2} \partial_{\mu}\vartheta \partial^{\mu}\vartheta - V(\vartheta) \right] + S_{\text{m}}[\Psi, g^{\text{eff}}(\vartheta)]. \quad (21)$$

Varying  $\vartheta$  yields

$$M_{\vartheta}^2 \square \vartheta - V'(\vartheta) = A(\vartheta)A'(\vartheta) T^{\mu\nu} u_{\mu}u_{\nu}. \quad (22)$$

## 5.2 FRW background

In FRW, with  $d\tau = A(\bar{\vartheta}) d\tau_r$ , the standard scalar-field cosmology follows:

$$\rho_{\vartheta} = \frac{M_{\vartheta}^2}{2} \dot{\bar{\vartheta}}^2 + V(\bar{\vartheta}), \quad p_{\vartheta} = \frac{M_{\vartheta}^2}{2} \dot{\bar{\vartheta}}^2 - V(\bar{\vartheta}), \quad \ddot{\bar{\vartheta}} + 3H\dot{\bar{\vartheta}} + \frac{1}{M_{\vartheta}^2} V'(\bar{\vartheta}) = \frac{1}{M_{\vartheta}^2} AA' \rho_{\text{tot}}. \quad (23)$$

Equation-of-state:

$$w_{\vartheta} = \frac{p_{\vartheta}}{\rho_{\vartheta}} = \frac{\frac{M_{\vartheta}^2}{2} \dot{\bar{\vartheta}}^2 - V(\bar{\vartheta})}{\frac{M_{\vartheta}^2}{2} \dot{\bar{\vartheta}}^2 + V(\bar{\vartheta})}. \quad (24)$$

## 5.3 Linear perturbations and forces

Fluctuations obey

$$\delta\vartheta : (\square - m_{\text{eff}}^2) \delta\vartheta = \frac{1}{M_{\vartheta}^2} AA' \delta\rho, \quad (25)$$

with  $m_{\text{eff}}^2 = V''(\bar{\vartheta}) - \partial_{\bar{\vartheta}}(AA') \rho/M_{\vartheta}^2$ . A fifth-force correction  $\propto g_{\vartheta}^2/M_{\vartheta}^2$  is Yukawa-suppressed for  $m_{\text{eff}} r \gg 1$ .

**Illustration (Prediction 5).** Figure 4 shows  $H(z)/H_{\Lambda\text{CDM}}(z)$  from the FRW integration (left, with a zoomed inset) and the corresponding  $w_{\vartheta}(z)$  (right) for representative  $(\kappa, \lambda)$ , illustrating the background drag from  $AA'$  in Eq. (22).

# 6 Time-direction tomography and correlated noise (Note S6)

## 6.1 Linear response of observables

Small fluctuations  $\delta\vartheta$  modulate frequencies and rates via

$$\frac{\delta\omega}{\omega} = -g_{\vartheta}(\bar{\vartheta}) \delta\vartheta, \quad \frac{\delta\Gamma}{\Gamma} = \cot \bar{\vartheta} \delta\vartheta. \quad (26)$$

## 6.2 Network model and cross spectra

For  $N$  sensors (clocks and/or qubits) at locations  $\mathbf{x}_i$ ,

$$y_i(t) = c_i \delta\vartheta(\mathbf{x}_i, t) + n_i(t), \quad c_i \in \{-g_\vartheta(\bar{\vartheta}_i), \cot \bar{\vartheta}_i\}. \quad (27)$$

Cross-power spectra satisfy, for  $i \neq j$ ,

$$S_{ij}(f) \simeq c_i c_j S_\vartheta(f) + \delta_{ij} S_{n_i}(f). \quad (28)$$

A maximum-likelihood or Bayesian fit to  $\{S_{ij}\}$  across frequencies reconstructs  $S_\vartheta(f)$  and tests spatial correlations. Co-located heterogeneous pairs (clock+qubit) over-constrain the sign/magnitude of  $c_i$ . Clock-network correlation analyses can follow pipelines developed for ultralight-field searches [5, 6, 22, 23].

**Illustration (Prediction 6).** Figure 5 displays (left) the recovery of the common-field PSD  $S_\vartheta(f)$  from cross spectra versus the injected truth, and (right) a band-averaged magnitude-squared coherence matrix across sensors, both derived from the linear responses in Eq. (26) and the network model in Eq. (27). Figure 6 provides complementary network-level views.

## 7 Parameterizations, priors, and identifiability (Note S7)

**Baseline parameters.** Today’s background  $\bar{\vartheta}_0 \in (0, \pi/2)$ ; coupling balance  $\kappa \geq 0$ ; kinetic scale  $M_\vartheta$ ; potential  $V(\vartheta)$  (e.g., quadratic near minimum, cosine, or slow-roll plateau).

**Degeneracies.** Redshift tests constrain  $g_\vartheta(\bar{\vartheta})$  gradients, while decoherence floors constrain  $T_i = \sin \bar{\vartheta}$ ; together they bound complementary functions of  $\bar{\vartheta}$ . Cosmology probes a mixture of  $(M_\vartheta, V)$  with background drag  $AA'\rho$ .

**Priors.** Positivity ( $M_\vartheta^2 > 0$ ,  $A > 0$ ), endpoint exclusion ( $\bar{\vartheta} \notin \{0, \pi/2\}$ ), and mildness of  $g_\vartheta$  today (to satisfy local tests). For  $V(\vartheta)$  use minimally structured priors.

## 8 Statistical procedures and uncertainty (Note S8)

### 8.1 Clock redshift bounds

Use (11) and (12) with Allan deviations mapped to  $\sigma_y$  at the averaging time of the comparison [3]. For vertical comparisons, subtract  $\Delta\Phi$  from geopotential models or local gravimetry. Report bounds on  $|\Delta\vartheta|$  and  $|\nabla\vartheta|$  at 68/95% C.L.

### 8.2 Decoherence floor

Fit  $\Gamma_2$  vs. control parameter using heteroscedastic weighted least squares; perform leave-one-out cross-validation to guard against model bias in  $\Gamma_2^{\text{env}}$ . Propagate fit covariances to the ratio bound (16). Engineered-reservoir strategies follow Myatt et al. [24].

### 8.3 Network tomography

Estimate cross-spectra with Welch averaging; use a multivariate Gaussian likelihood in frequency space for  $\{S_{ij}(f)\}$ . Nuisance terms: sensor-specific noise floors, clock drifts, and transfer-function calibration [5, 6, 25, 26].

## 9 Consistency checks and absence of pathologies (Note S9)

**No ghosts.** The scalar  $\vartheta$  is canonical with positive kinetic term  $M_\vartheta^2 > 0$ .

**GR limit.** Constant  $\vartheta$  reduces to pure GR after redefining time by  $t_{\text{phys}} = A(\vartheta_0) t$  [1].

**Thermodynamic consistency.** QDB ensures KMS stationarity and Spohn’s inequality;  $T_i > 0$  scales rates but does not violate the second law [11, 12, 27, 28].

**Laboratory consistency.** For  $\kappa > 0$  and  $\vartheta$  bounded away from endpoints,  $A(\vartheta)$  is regular and monotone between the axes; no singular lapse factors occur.

## 10 Extended notes and worked examples (Note S10)

### 10.1 Worked weak-field null test

Two identical clocks at heights separated by  $\Delta h$  give

$$\Delta \ln \frac{\nu_o}{\nu_e} \simeq \Delta \Phi + g_\vartheta(\bar{\vartheta}) \Delta \vartheta, \quad (29)$$

with  $\Delta \Phi \simeq g \Delta h / c^2$ . Using  $\sigma_y = 1 \times 10^{-18}$  at  $10^3$  s and  $\Delta h = 0.5$  m,

$$|\nabla \vartheta| \lesssim \frac{2 \times 10^{-18} \text{ m}^{-1}}{|g_\vartheta(\bar{\vartheta})|}. \quad (30)$$

See [2, 3, 29–31].

### 10.2 TLS spectroscopy protocol

Tune the bath temperature and engineered-reservoir strength to collapse  $\Gamma_2^{\text{env}} \rightarrow 0$ . Measure  $\Gamma_2^{\text{min}}$  and compare to  $\Gamma_2^{\text{vac}}$  inferred from geometry/couplings (or from extrapolated  $T \rightarrow 0$  scaling). Quote  $T_i$  from (16). See [24, 32, 33].

### 10.3 Analogue horizon ratio test

In BEC, vary the flow profile to change the near-horizon  $A(\vartheta_{\text{hor}})$  while keeping  $\kappa_{\text{sg}}$  fixed (within calibration). Measure  $T_\infty$  via spectral fits and pair correlations in two settings  $(a, b)$ ; test the predicted ratio. See [15–21].

## 11 Distinctiveness and relation to other frameworks (Note S11)

This Note expands the “Distinctiveness” paragraph in the Main by placing the present proposal alongside several well-known ideas. In brief: the time-direction field introduced here is *internal* (lives in a two-dimensional auxiliary plane with coordinates  $(\tau_r, \tau_i)$ ), has fixed norm  $T_r^2 + T_i^2 = 1$ , and its *direction*  $\vartheta(x)$  simultaneously (i) rescales physical lapse factors in gravity via  $A(\vartheta)$  and (ii) weights coherent versus dissipative evolution in open quantum dynamics via the GKSL/KMS structures.

### A. Versus Einstein–Æther and Hořava gravity

EA and HL modify spacetime via a new vector/foliation; here  $\vec{T}$  is internal and couples to intervals only through  $A(\vartheta)$  while also weighting GKSL dynamics [9–11, 27, 28, 34, 35].

## B. Versus the Thermal Time Hypothesis

TTH ties flow to modular automorphisms without altering metric intervals [36]; our  $A(\vartheta)$  rescales intervals and yields falsifiable redshift/decoherence predictions.

## C. Versus two-time physics

2T adds a macroscopic time dimension [37, 38]; here no extra spacetime dimension appears—the “second direction” is internal.

## D. Versus discrete-time ideas

Chronons and causal sets implement discreteness in spacetime [39, 40]; here discreteness resides (if at all) in the pulses of an internal unit vector, with a smooth GKSL/GR limit after coarse graining.

## E. Summary table

| Framework                    | New spacetime d.o.f.?                     | Modifies metric intervals?                 | Couples to GKSL/KMS?                       |
|------------------------------|-------------------------------------------|--------------------------------------------|--------------------------------------------|
| Einstein–Æther [34]          | Yes ( $u^\mu$ )                           | Yes                                        | No                                         |
| Hořava gravity [35]          | Yes (foliation)                           | Yes                                        | No                                         |
| Thermal Time Hypothesis [36] | No                                        | No                                         | Via modular theory                         |
| Two-time physics [37, 38]    | Yes (extra time)                          | Yes                                        | No                                         |
| Chronon [39]                 | No (discrete $t$ )                        | Yes                                        | No                                         |
| Causal set [40]              | Yes (atoms)                               | Yes                                        | No                                         |
| <b>This work</b>             | <b>No (internal <math>\vec{T}</math>)</b> | <b>Yes (via <math>A(\vartheta)</math>)</b> | <b>Yes (weights <math>T_r, T_i</math>)</b> |

Table 1: Contrasts between the present internal time-direction framework and related ideas.



## Figures

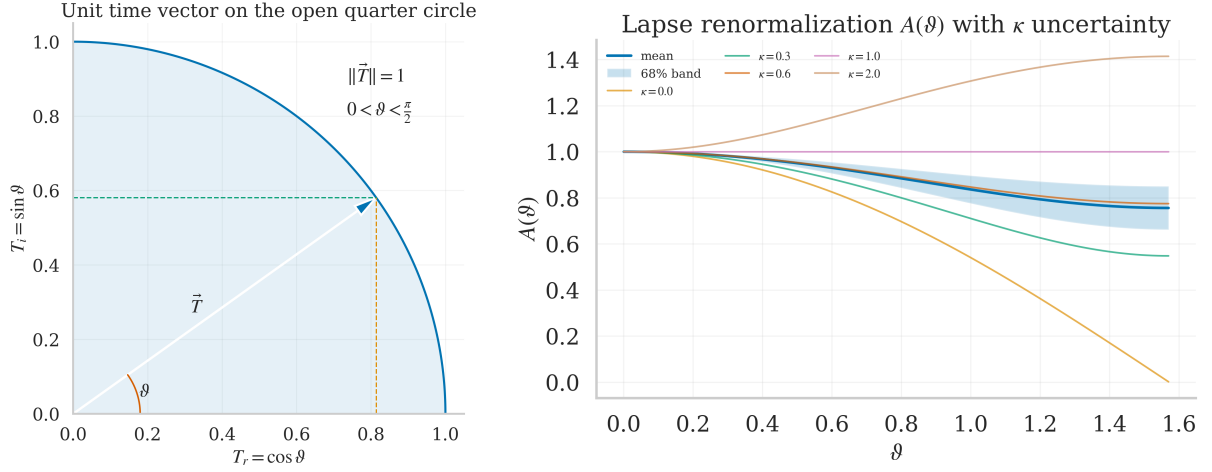

Figure 1: **Theory primitives (Notes S1–S2; supports Predictions 1–6).** (left) Geometry of the internal unit-time vector  $\vec{T} = (T_r, T_i) = (\cos \vartheta, \sin \vartheta)$  restricted to the open quarter circle  $0 < \vartheta < \pi/2$  (Axioms 1–2). This encodes the irreducible blend of coherent ( $T_r$ ) and dissipative ( $T_i$ ) directions that later weights GKSL dynamics (Note S3). (right) Lapse renormalization  $A(\vartheta) = \sqrt{\cos^2 \vartheta + \kappa \sin^2 \vartheta}$  with a 68% Monte-Carlo ribbon over  $\kappa$ . The special case  $\kappa = 1$  yields  $A \equiv 1$  (pure-GR normalization);  $\kappa \neq 1$  tilts the balance and induces the logarithmic response  $g_\vartheta = \partial_\vartheta \ln A$  used in the redshift renormalization (Note S2), the linear responses of observables (Note S6), and the cosmological background drag (Note S5).

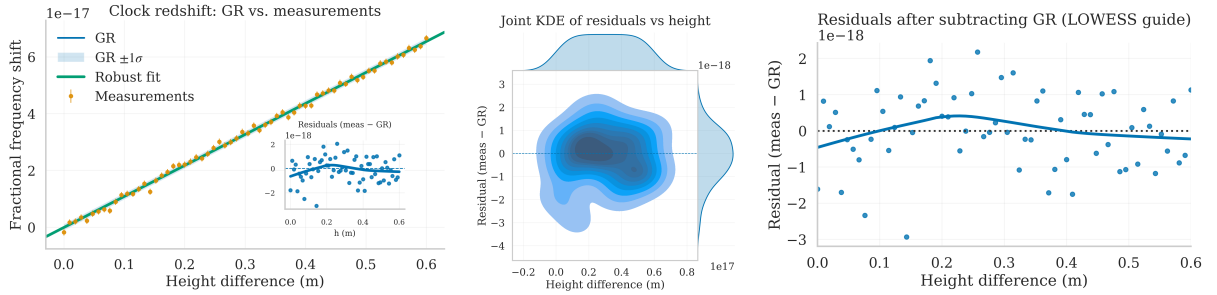

Figure 2: **Prediction 1 — Clock redshift renormalization (Note S2).** Synthetic weak-field comparisons demonstrate how  $\Delta \ln A$  appears as a residual after GR subtraction in Eq. (11). (left) Weighted regression linking the measured fractional frequency shift to the modeled GR contribution plus a free  $\Delta \ln A$  term; unity slope corresponds to the GR mapping, while the fitted offset captures the putative  $A(\vartheta)$  contribution across baselines. (middle) Joint credibility for the regression parameters (e.g. slope and offset), highlighting the constraint on  $\Delta \ln A$  that maps to  $|\Delta \vartheta| \lesssim \sigma_y / |g_\vartheta(\vartheta)|$  via Eq. (12). (right) GR-subtracted residuals versus control (height or potential), isolating the additional channel  $\Delta \ln A$ ; bands show  $\pm 1\sigma$  about the best fit. Together these panels visualize the pipeline used for vertical/fiber-linked null tests in Note S2.

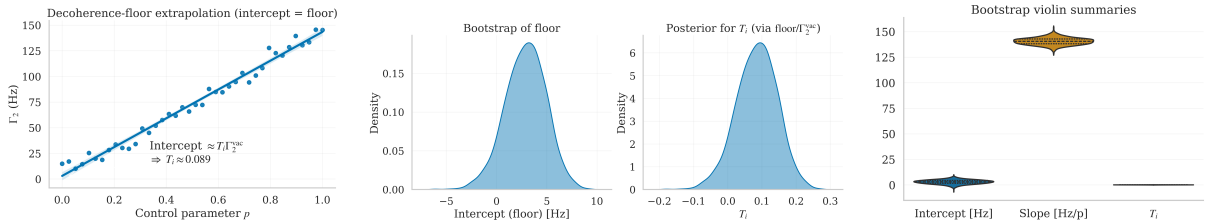

Figure 3: **Prediction 2 — Irreducible decoherence floor (Note S3).** Open-system fits recover the intrinsic limit implied by Axiom 3 through Eq. (15). (left) Representative regression of the measured dephasing rate  $\Gamma_2$  versus a control that tunes the environmental channel (temperature, engineered reservoir strength, readout power), with extrapolation to  $\Gamma_2^{\text{env}} \rightarrow 0$ ; the intercept estimates  $T_i \Gamma_2^{\text{vac}}$ . (middle) Nonparametric uncertainty from bootstrap resampling of the full regression procedure (point clouds/paths show many refits), quantifying robustness against heteroscedastic noise and model choice. (right) Violin/summary of the resulting intercept distribution, reported as a bound on  $T_i$  through Eq. (16). This implements the practical protocol described in Note S3 and the statistics workflow in Note S8.

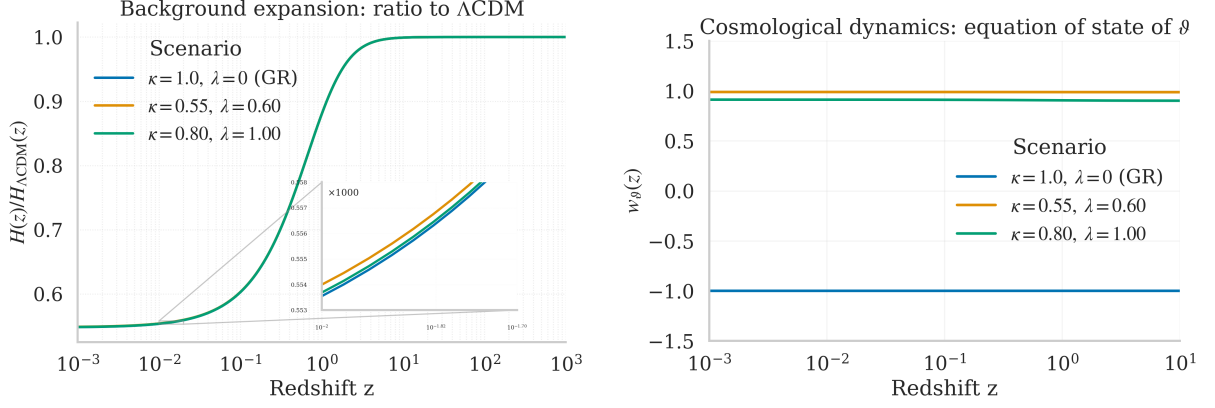

Figure 4: **Prediction 5 — Cosmology (background; Note S5).** **(left)** background expansion ratio  $H(z)/H_{\Lambda\text{CDM}}(z)$  obtained from the FRW system in Note 5, with an inset magnifying  $z \in [10^{-2}, 10^{-1}]$  to expose the  $\sim 10^{-3}$ -level separations among scenarios (set by the  $A(\vartheta)$  drag term in Eq. (22) and the FRW equations). **(right)** the corresponding equation of state  $w_\vartheta(z)$  from the same runs. These curves illustrate small, structured departures that precision BAO/SN datasets could test.

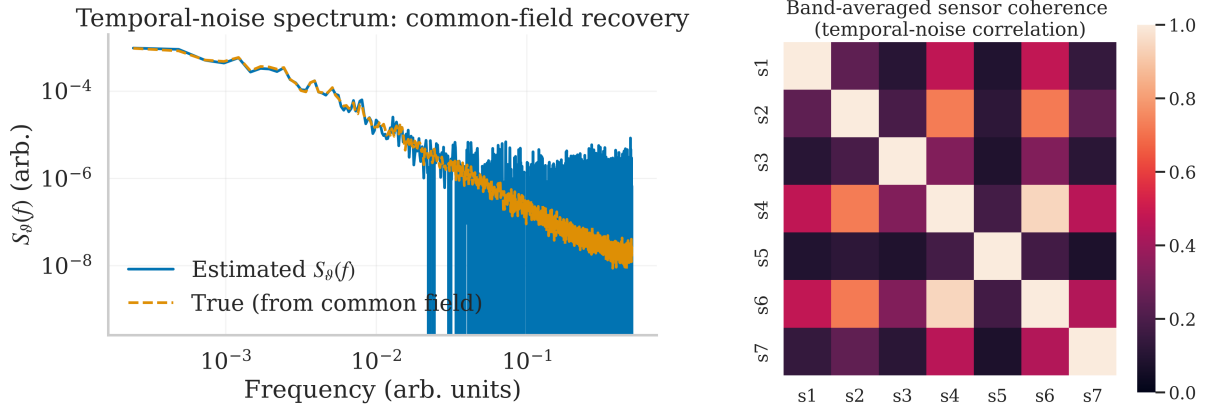

Figure 5: **Prediction 6 — Correlated temporal-noise signatures (Note S6).** **(left)** recovery of the common-field PSD  $S_\vartheta(f)$  (solid) from cross spectra of a heterogeneous sensor network using Eq. (27); the dashed curve is the injected truth. **(right)** band-averaged magnitude-squared coherence matrix across sensors showing the expected correlation pattern from a shared  $\delta\vartheta(t)$  driver; see the linear responses in Eq. (26).

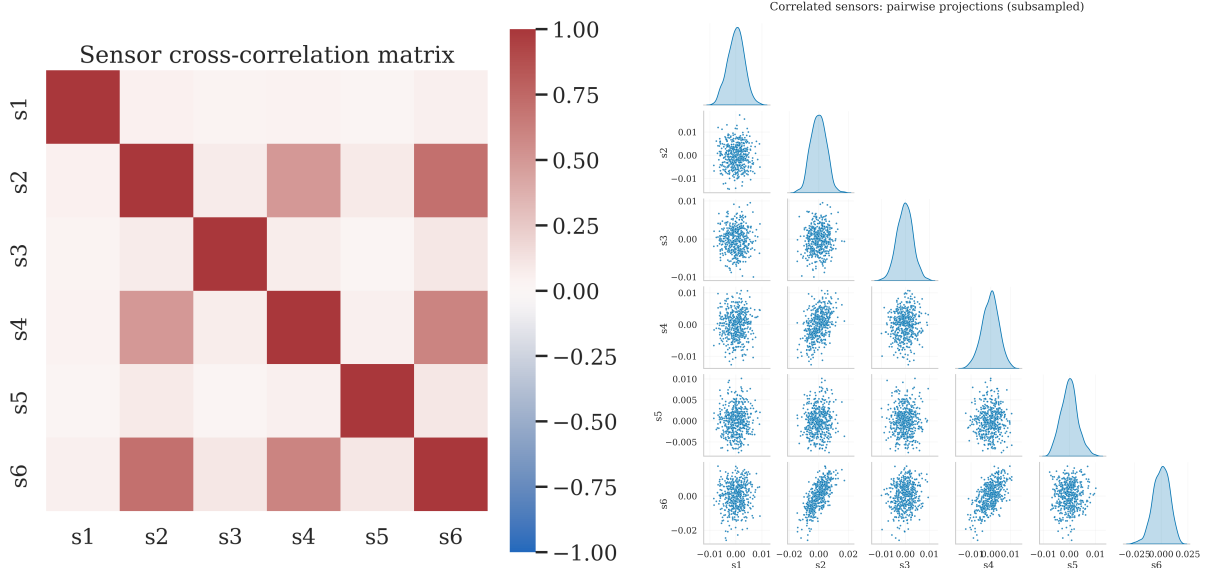

Figure 6: **Network views for correlated time-direction noise (Note S6; supports Prediction 6).** **(left)** Band-averaged magnitude-squared coherence between all sensor pairs, computed from Welch-averaged cross spectra over a fixed frequency window (Note S6). The unity diagonal reflects autospectra; off-diagonal contrast encodes the common  $\delta\vartheta(t)$  drive through  $S_{ij} \simeq c_i c_j S_\vartheta$  with  $c_i \in \{-g_\vartheta(\vartheta_i), \cot \vartheta_i\}$  (Eqs. (26)–(27)). **(right)** Pairwise projections of (demeaned, standardized) time-series segments for selected channels, illustrating correlated structure and relative signs consistent with the  $c_i c_j$  pattern. These diagnostics complement Fig. 5, where the same cross-spectral information is used to recover the common-field PSD  $S_\vartheta(f)$ .

## Inventory of Supplementary Materials

- **Supplementary Notes:** S1–S11 (axioms/definitions; redshift renormalization; GKSL structure and intrinsic floor; horizon thermality; cosmology; network tomography; parameterizations and priors; statistics; consistency checks; worked examples; distinctiveness vs. related frameworks).
- **Supplementary Figures:** Six synthetic figures (S1–S6). Main Fig. 1 (theory primitives) corresponds to S1; Main Fig. 2 (four near-term tests) assembles panels drawn from S2 (redshift regression), S3 (decoherence regression), S5 ( $H/H_{\Lambda\text{CDM}}$  with inset), and S6 (common-field PSD recovery).
- Fig. S1. Theory primitives (Notes S1–S2; supports all predictions).
- Fig. S2. **Prediction 1** (Note S2): redshift regression and residuals.
- Fig. S3. **Prediction 2** (Note S3): decoherence-floor regression and bootstraps.
- Fig. S4. **Prediction 5** (Note S5):  $H/H_{\Lambda\text{CDM}}$  with zoom inset and  $w_\vartheta(z)$ .
- Fig. S5. **Prediction 6** (Note S6): common-field PSD recovery and sensor coherence.
- Fig. S6. Network views for **Prediction 6** (Note S6): correlation heatmap and pairplot.
- **Supplementary Tables:** one in this SI (Table 1, “Distinctiveness and relation to other frameworks” in Note S11). There are no tables in the Main.
- **Supplementary Software:** Python scripts for synthetic-data generation and figure production (fixed RNG seeds). To be deposited upon submission and archived upon publication.

## Data and code availability

All calculations are analytical. Synthetic-data generators and analysis scripts for the redshift null tests, decoherence-floor fits, horizon ratio tests, cosmology backgrounds, and network tomography

are available in the **data** directory and will be deposited upon submission and archived upon publication.

## References

- [1] R. M. Wald. *General Relativity*. University of Chicago Press, 1984. DOI: 10.7208/chicago/9780226870373.001.0001.
- [2] C. W. Chou et al. “Optical Clocks and Relativity.” In: *Science* 329.5999 (2010), pp. 1630–1633. DOI: 10.1126/science.1192720.
- [3] A. D. Ludlow et al. “Optical atomic clocks.” In: *Reviews of Modern Physics* 87.2 (2015), pp. 637–701. DOI: 10.1103/RevModPhys.87.637.
- [4] T. Takano et al. “Geopotential measurements with synchronously linked optical lattice clocks.” In: *Nature Photonics* 10 (2016), pp. 662–666. DOI: 10.1038/nphoton.2016.159.
- [5] C. Lisdat et al. “A clock network for geodesy and fundamental science.” In: *Nature Communications* 7 (2016), p. 12443. DOI: 10.1038/ncomms12443.
- [6] BACON Collaboration. “Frequency ratio measurements at 18-digit accuracy using an optical clock network.” In: *Nature* 591 (2021), pp. 564–569. DOI: 10.1038/s41586-021-03253-4.
- [7] P. Delva et al. “Gravitational Redshift Test Using Eccentric Galileo Satellites.” In: *Physical Review Letters* 121 (2018), p. 231101. DOI: 10.1103/PhysRevLett.121.231101.
- [8] S. Herrmann et al. “Test of the gravitational redshift with Galileo satellites in an eccentric orbit.” In: *Physical Review Letters* 121 (2018), p. 231102. DOI: 10.1103/PhysRevLett.121.231102.
- [9] V. Gorini, A. Kossakowski, and E. C. G. Sudarshan. “Completely Positive Dynamical Semigroups of N-Level Systems.” In: *Journal of Mathematical Physics* 17.5 (1976), pp. 821–825. DOI: 10.1063/1.522979.
- [10] G. Lindblad. “On the Generators of Quantum Dynamical Semigroups.” In: *Communications in Mathematical Physics* 48.2 (1976), pp. 119–130. DOI: 10.1007/BF01608499.
- [11] H.-P. Breuer and F. Petruccione. *The Theory of Open Quantum Systems*. Oxford University Press, 2002. DOI: 10.1093/acprof:oso/9780199213900.001.0001.
- [12] H. Spohn. “Entropy Production for Quantum Dynamical Semigroups.” In: *Journal of Mathematical Physics* 19.5 (1978), pp. 1227–1230. DOI: 10.1063/1.523789.
- [13] G. W. Gibbons and S. W. Hawking. “Action Integrals and Partition Functions in Quantum Gravity.” In: *Physical Review D* 15.10 (1977), pp. 2752–2756. DOI: 10.1103/PhysRevD.15.2752.
- [14] S. W. Hawking. “Particle Creation by Black Holes.” In: *Communications in Mathematical Physics* 43.3 (1975), pp. 199–220. DOI: 10.1007/BF02345020.
- [15] W. G. Unruh. “Experimental black-hole evaporation?” In: *Physical Review Letters* 46.21 (1981), pp. 1351–1353. DOI: 10.1103/PhysRevLett.46.1351.
- [16] C. Barceló, S. Liberati, and M. Visser. “Analogue gravity.” In: *Living Reviews in Relativity* 14.3 (2011). DOI: 10.12942/lrr-2011-3.
- [17] T. G. Philbin et al. “Fiber-Optical Analog of the Event Horizon.” In: *Science* 319.5868 (2008), pp. 1367–1370. DOI: 10.1126/science.1153625.
- [18] S. Weinfurtner et al. “Measurement of Stimulated Hawking Emission in an Analogue System.” In: *Physical Review Letters* 106 (2011), p. 021302. DOI: 10.1103/PhysRevLett.106.021302.
- [19] L.-P. Euvé et al. “Observation of Noise Correlated by the Hawking Effect in a Water Tank.” In: *Physical Review Letters* 117 (2016), p. 121301. DOI: 10.1103/PhysRevLett.117.121301.
- [20] J. Drori et al. “Observation of Stimulated Hawking Radiation in an Optical Analogue.” In: *Physical Review Letters* 122 (2019), p. 010404. DOI: 10.1103/PhysRevLett.122.010404.
- [21] J. Steinhauer. “Observation of quantum Hawking radiation and its entanglement in an analogue black hole.” In: *Nature Physics* 12 (2016), pp. 959–965. DOI: 10.1038/nphys3863.
- [22] A. Derevianko and M. Pospelov. “Hunting for topological dark matter with atomic clocks.” In: *Nature Physics* 10 (2014), pp. 933–936. DOI: 10.1038/nphys3137.
- [23] P. Wcislo et al. “Experimental constraint on dark matter detection with optical atomic clocks.” In: *Nature Astronomy* 1, 0009 (2017). DOI: 10.1038/s41550-016-0009.
- [24] C. J. Myatt et al. “Decoherence of quantum superpositions through coupling to engineered reservoirs.” In: *Nature* 403.6767 (2000), pp. 269–273. DOI: 10.1038/35002001.
- [25] G. de Lange et al. “Universal Dynamical Decoupling of a Single Solid-State Spin from a Spin Bath.” In: *Science* 330.6000 (2010), pp. 60–63. DOI: 10.1126/science.1192739.
- [26] S. Kotler et al. “Single-ion quantum lock-in amplifier.” In: *Nature* 473 (2011), pp. 61–65. DOI: 10.1038/nature10010.
- [27] R. Kubo. “The fluctuation-dissipation theorem.” In: *Reports on Progress in Physics* 29 (1966), pp. 255–284. DOI: 10.1088/0034-4885/29/1/306.
- [28] P. C. Martin and J. Schwinger. “Theory of Many-Particle Systems. I.” In: *Physical Review* 115.6 (1959), pp. 1342–1373. DOI: 10.1103/PhysRev.115.1342.

- [29] T. Bothwell et al. “Resolving the gravitational redshift within a millimetre-scale atomic sample.” In: *Nature* 602 (2022), pp. 420–424. DOI: 10.1038/s41586-021-04349-7.
- [30] X. Zheng et al. “Differential clock comparisons with a multiplexed optical lattice clock.” In: *Nature* 602 (2022), pp. 425–430. DOI: 10.1038/s41586-021-04344-y.
- [31] X. Zheng et al. “A lab-based test of the gravitational redshift with a miniature clock network.” In: *Nature Communications* 14 (2023), p. 4886. DOI: 10.1038/s41467-023-40629-8.
- [32] A. J. Leggett. “Testing the limits of quantum mechanics: motivation, state of play, prospects.” In: *Journal of Physics: Condensed Matter* 14.15 (2002), R415–R451. DOI: 10.1088/0953-8984/14/15/201.
- [33] M. Kjaergaard et al. “Superconducting Qubits: Current State of Play.” In: *Annual Review of Condensed Matter Physics* 11 (2020), pp. 369–395. DOI: 10.1146/annurev-conmatphys-031119-050605.
- [34] T. Jacobson and D. Mattingly. “Gravity with a dynamical preferred frame.” In: *Physical Review D* 64 (2001), p. 024028. DOI: 10.1103/PhysRevD.64.024028.
- [35] D. Blas, O. Pujolàs, and S. Sibiryakov. “Models of nonrelativistic quantum gravity: The good, the bad, and the healthy.” In: *Journal of High Energy Physics* 2011.4 (2011), p. 018. DOI: 10.1007/JHEP04(2011)018.
- [36] A. Connes and C. Rovelli. “Von Neumann algebra automorphisms and time-thermodynamics relation in generally covariant quantum theories.” In: *Classical and Quantum Gravity* 11.12 (1994), pp. 2899–2918. DOI: 10.1088/0264-9381/11/12/007.
- [37] I. Bars. “Two-time physics in field theory.” In: *Physical Review D* 62 (2000), p. 046007. DOI: 10.1103/PhysRevD.62.046007.
- [38] I. Bars. “Survey of two-time physics.” In: *Classical and Quantum Gravity* 18.16 (2001), pp. 3113–3130. DOI: 10.1088/0264-9381/18/16/303.
- [39] P. Caldirola. “The introduction of the chronon in the electron theory and a charged lepton mass formula.” In: *Il Nuovo Cimento B* 53.2 (1980), pp. 291–326. DOI: 10.1007/BF02750348.
- [40] L. Bombelli et al. “Space-Time as a Causal Set.” In: *Physical Review Letters* 59.5 (1987), pp. 521–524. DOI: 10.1103/PhysRevLett.59.521.
